# Supplementary material
Source: Royal Society of Chemistry journal article supplement (doi:10.1039/d6ea00004e)
Supplement: d6ea00004e1.pdf [file d6ea00004e1.pdf]

ARTICLE

Supplementary material for

Reduced U.S. Methane Emissions during the COVID-19 Pandemic

Sergio Ibarra-Espinosa<sup>a,b\*,+</sup>, Lei Hu<sup>b</sup>, Colin Harkins<sup>a,c</sup>, Brian C. McDonald<sup>c</sup>, Scot M. Miller<sup>d</sup>, Youmi Oh<sup>a,b</sup>, Lori Bruhwiler<sup>b</sup>, Colm Sweeney<sup>b</sup>, Arlyn Andrews<sup>b</sup>

Cooperative Institute for Research in Environmental Sciences, University of Colorado-Boulder, Boulder, CO, United States.  
NOAA Global Monitoring Laboratory, Boulder, CO, United States.  
+Now at Cooperative Institute for Satellite Earth System Studies (CISESS)/Earth System Science Interdisciplinary Center (ESSIC), University of Maryland  
NOAA Chemical Sciences Laboratory, Boulder, CO, United States.  
Department of Environmental Health and Engineering, Whiting School of Engineering, Johns Hopkins University, Baltimore, MD 21218.  
Supplementary Information available: [details of any supplementary information available should be included here]. See DOI: 10.1039/x0xx00000x

Received 00th January 20xx,  
Accepted 00th January 20xx

DOI: 10.1039/x0xx00000x

Contents of this file

Figures S1 to S14

Table S1

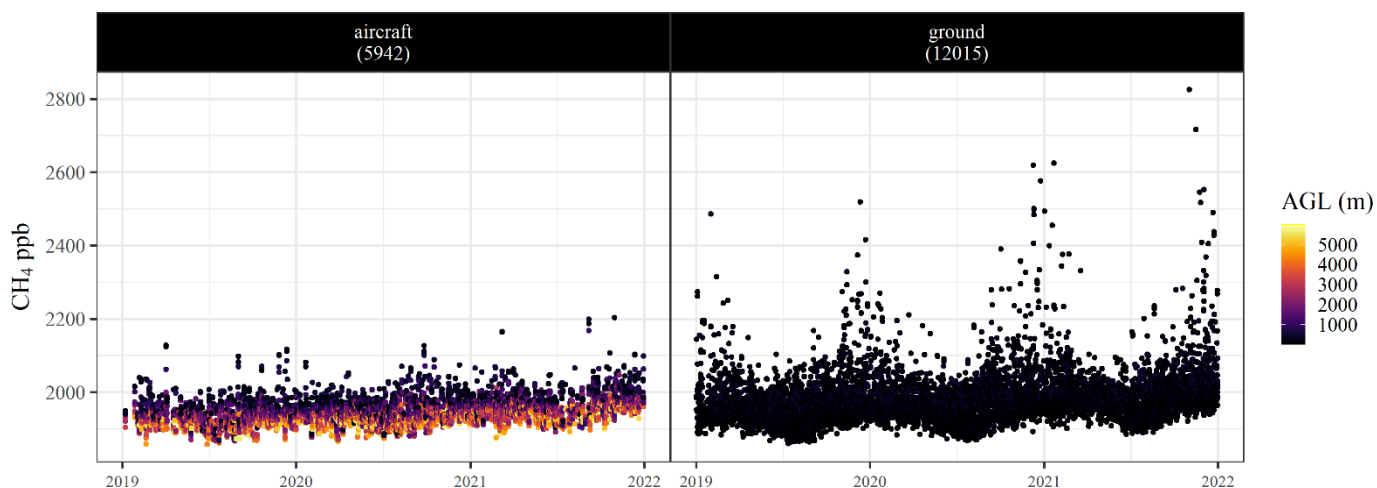

Figure S1. Assimilated methane observations from flasks collected at a) aircraft, b) ground sites.

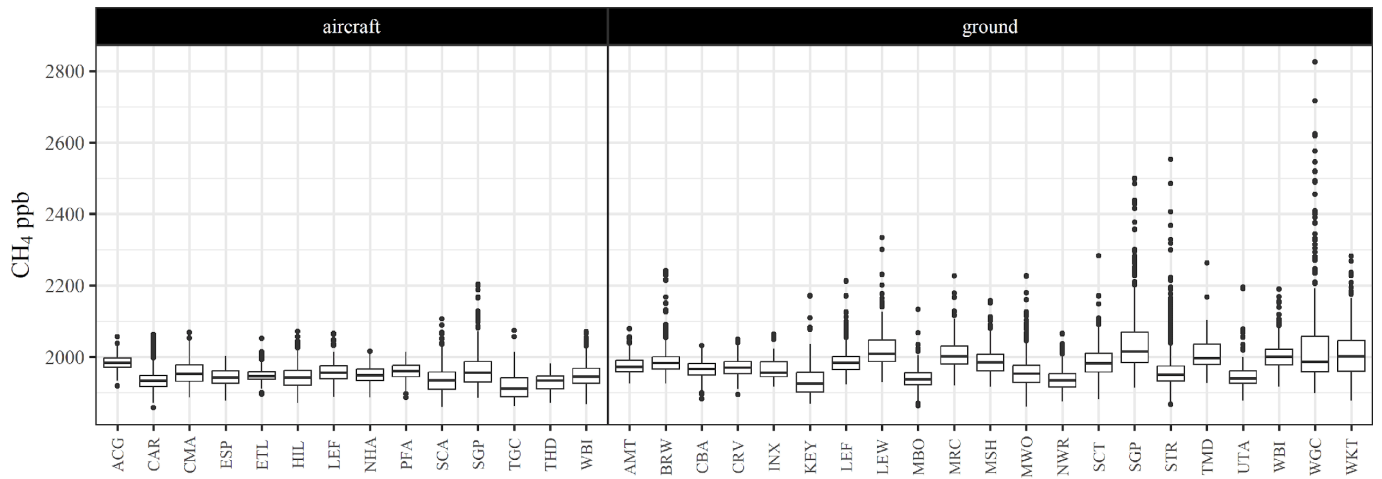

**Figure S2.** Boxplots of CH<sub>4</sub> observations for each surface and aircraft site.

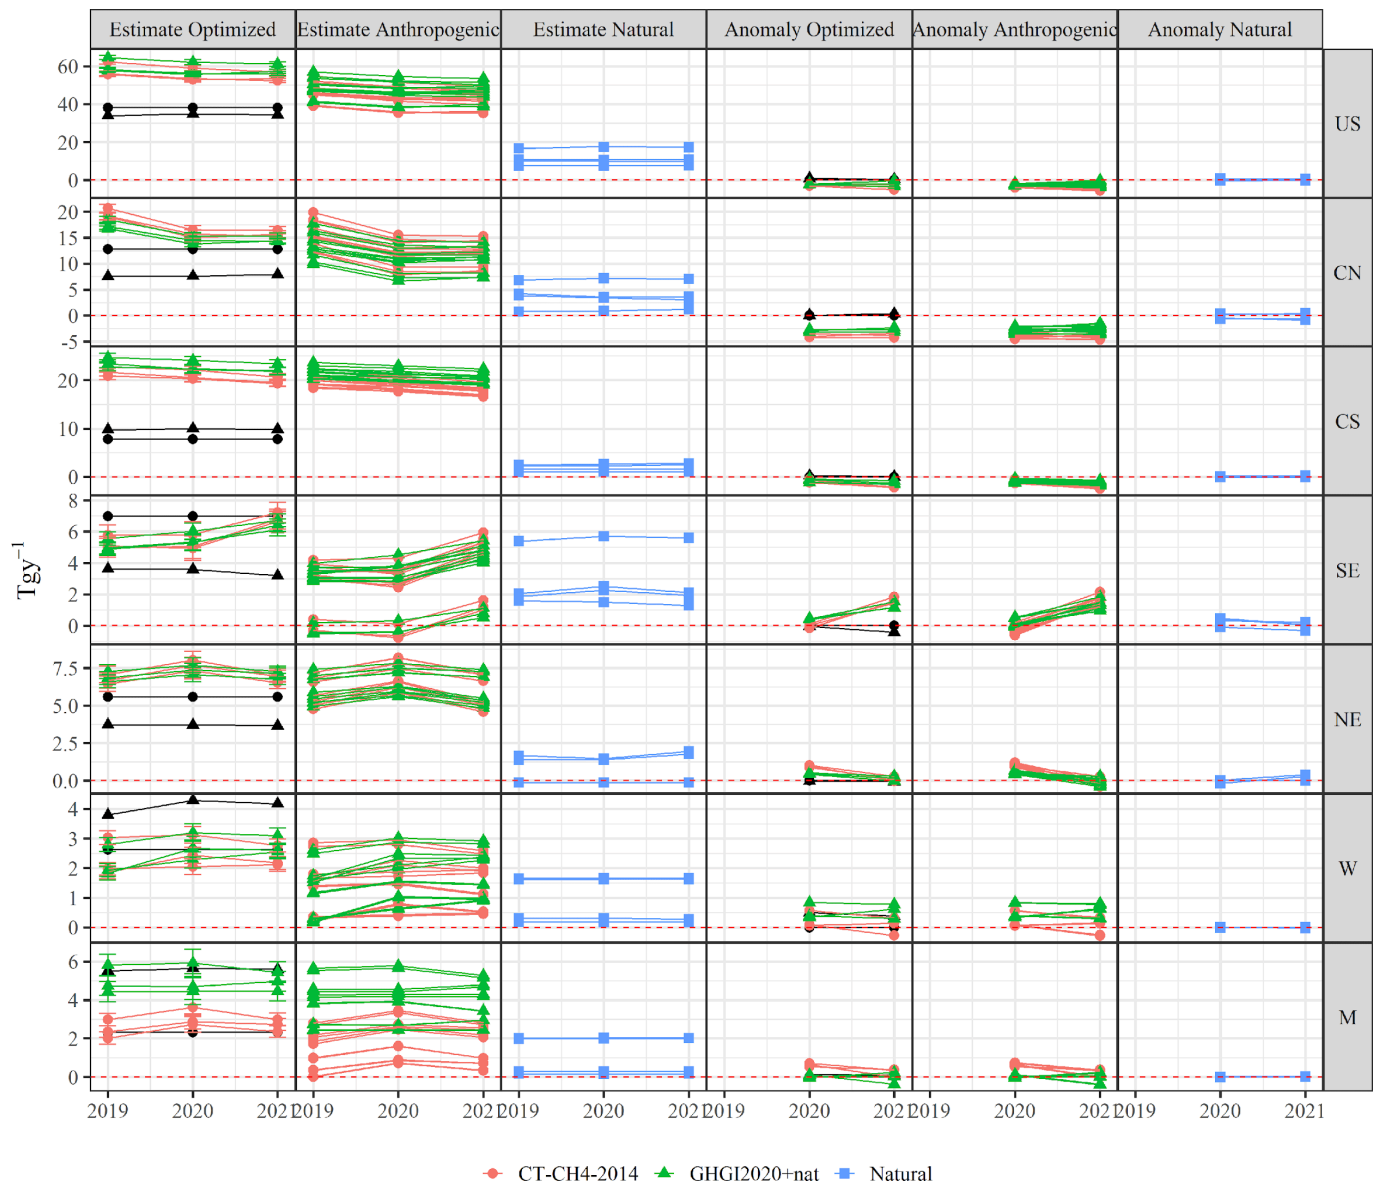

**Figure S3.** Estimation of optimized total, natural, and anthropogenic emissions, and their anomalies 2020-2019 and 2021-2019 in 2019, 2020 and 2021 (Tgy-1) over US and inner regions. The lines in color black indicate priors. CT-CH<sub>4</sub>\_2014 is CarbonTracker-CH<sub>4</sub> (Bruhwiler et

al., 2014) and GHGI2020+nat is US EPA's GHGI (Maasakkers et al., 2023; EPA, 2023) and natural emissions including wetlands (Hu et al., 2025).

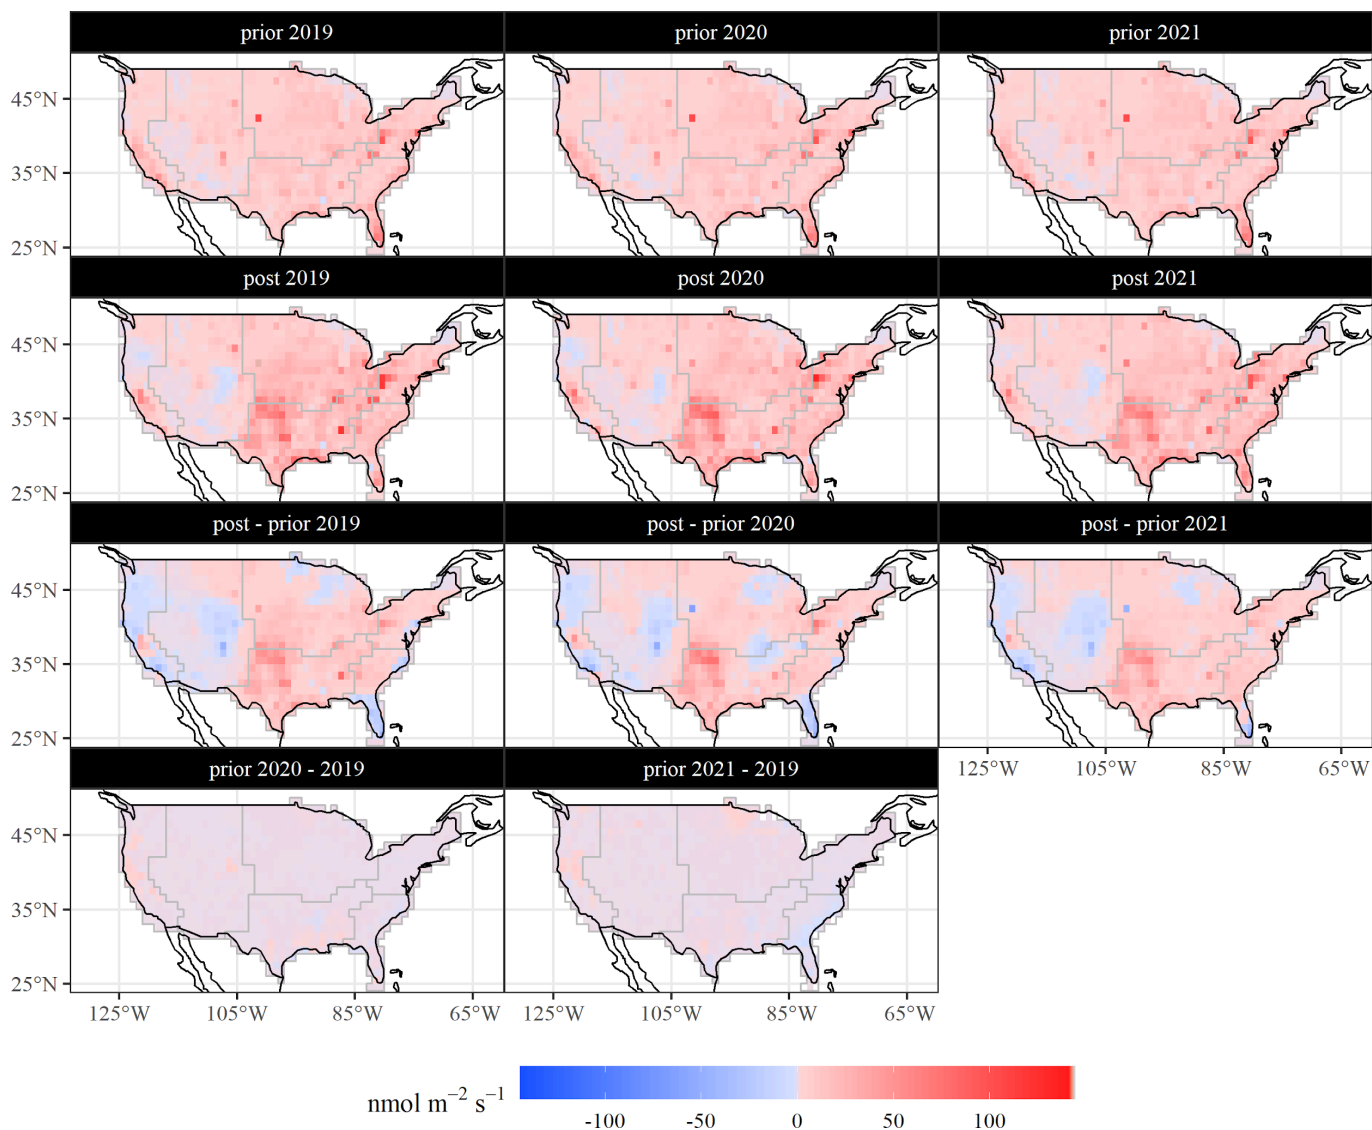

**Figure S4.** Mean methane fluxes (nmol m<sup>-2</sup> s<sup>-1</sup>) by year from optimized posteriors (top row), priors and their difference by year. Also, mean anomaly of priors (bottom).

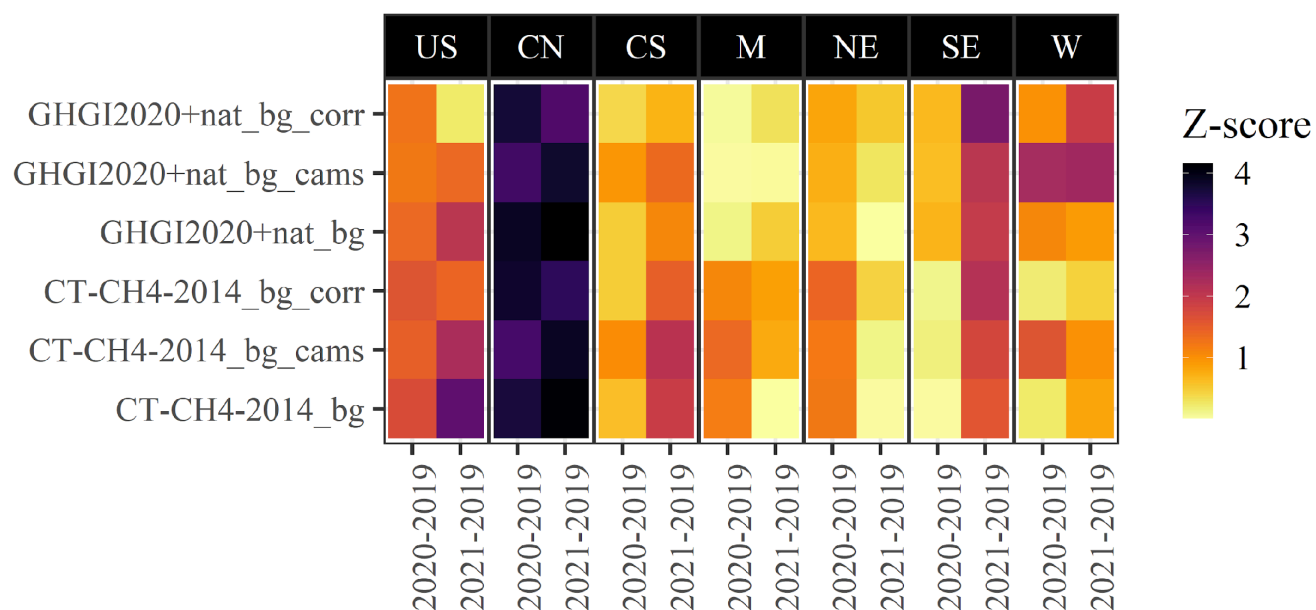

**Figure S5.** z-scores for to assess the difference between years for each ensemble member.

**Table S1.** P.value of the Mann-Whitney U test between differences 2020 and 2019 with 2019 by US region (R Core Team, 2024). The test was performed between ensemble members and periods for each region.

| p.value          | US     | CN     | CS     | M      | NE     | SE     | W      |
|------------------|--------|--------|--------|--------|--------|--------|--------|
| <b>2020-2019</b> | 0.0313 | 0.0313 | 0.0313 | 0.0938 | 0.0313 | 0.1563 | 0.0313 |
| <b>2021-2019</b> | 0.0313 | 0.0313 | 0.0313 | 0.4375 | 0.1563 | 0.0313 | 0.0938 |

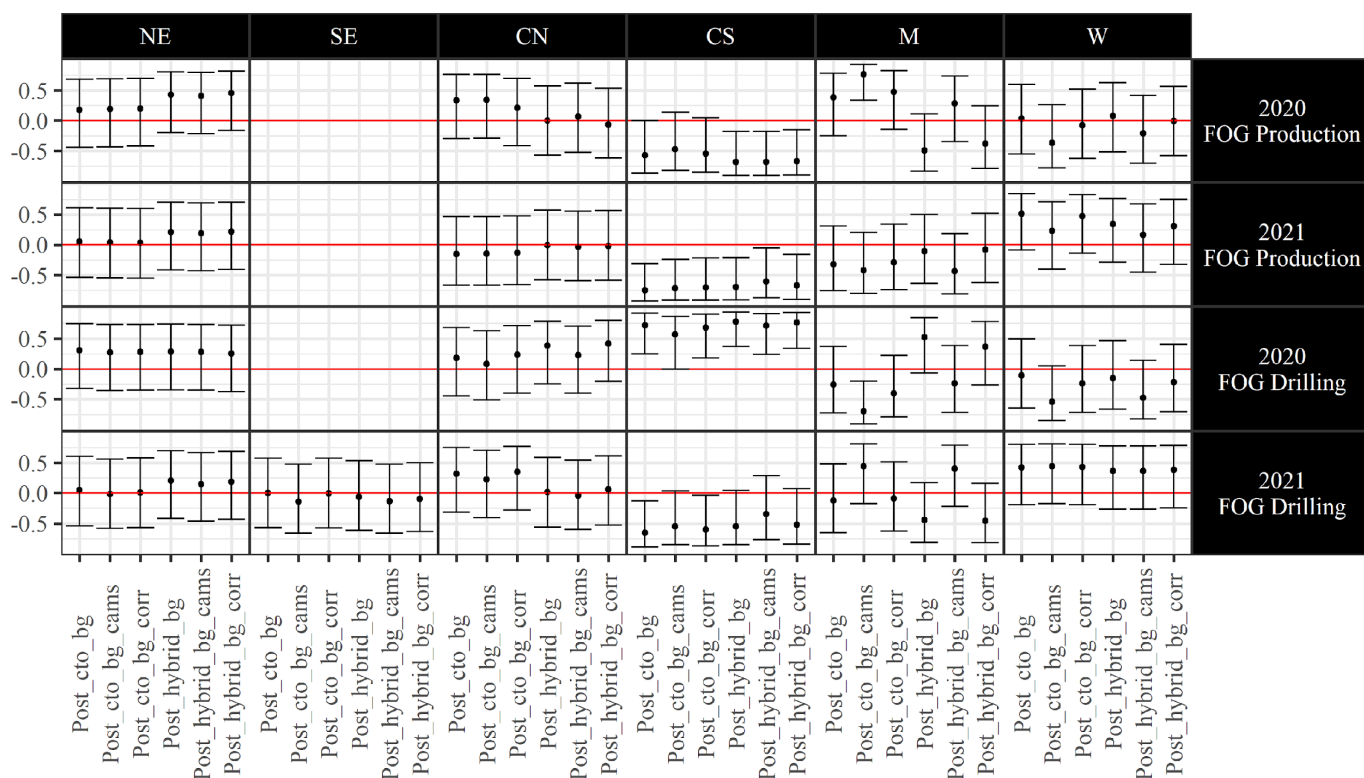

**Figure S6.** Correlation between posterior estimates and FOG emissions. Posterior emissions in the Central South are highly correlated with FOG drilling in 2020 for all ensemble members.

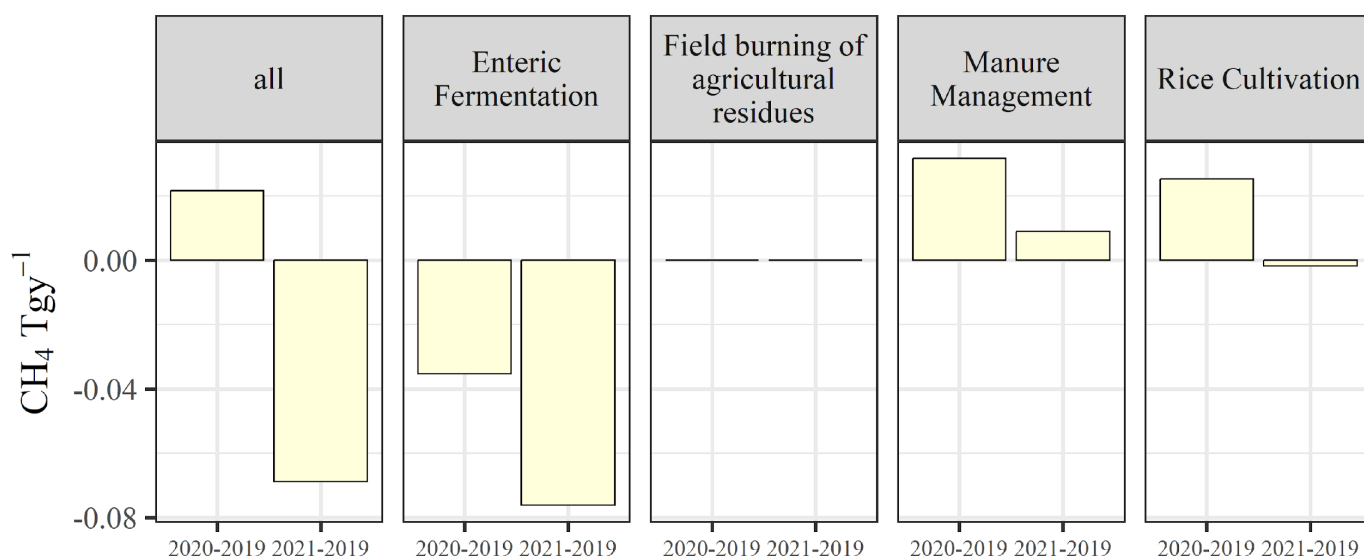

**Figure S7.** 2020-2019 and 2021-2019 methane anomalies in the agriculture sector ( $\text{Tgy}^{-1}$ ) from US EPA (2024).

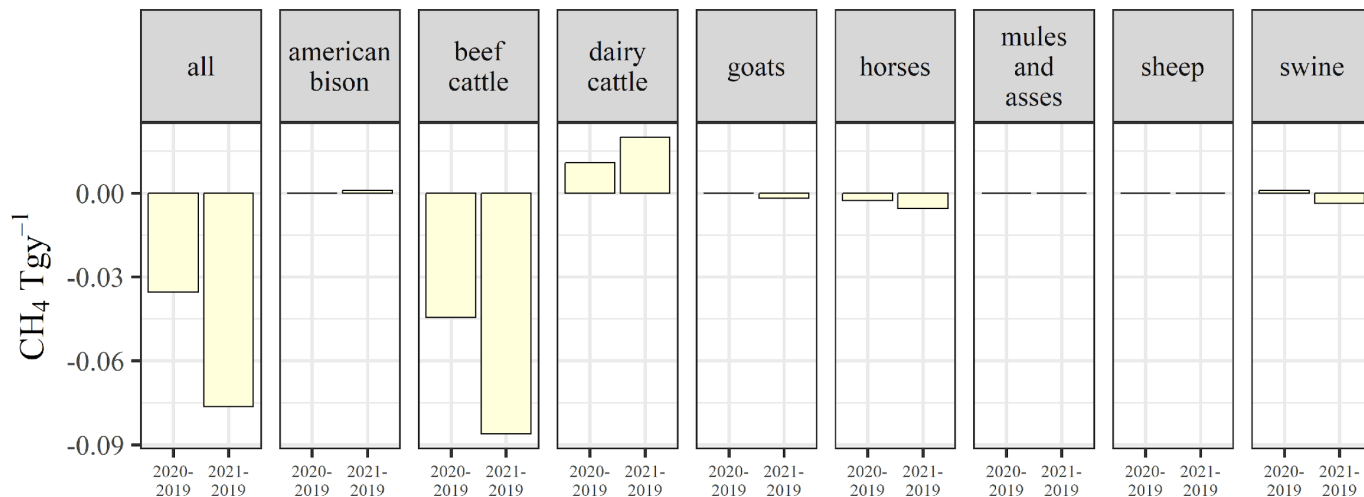

**Figure S8.** 2020-2019 and 2021-2019 CH<sub>4</sub> emission anomalies (Tgy<sup>-1</sup>) for the enteric fermentation sub-category of the agriculture category in the EPA Inventory (2024).

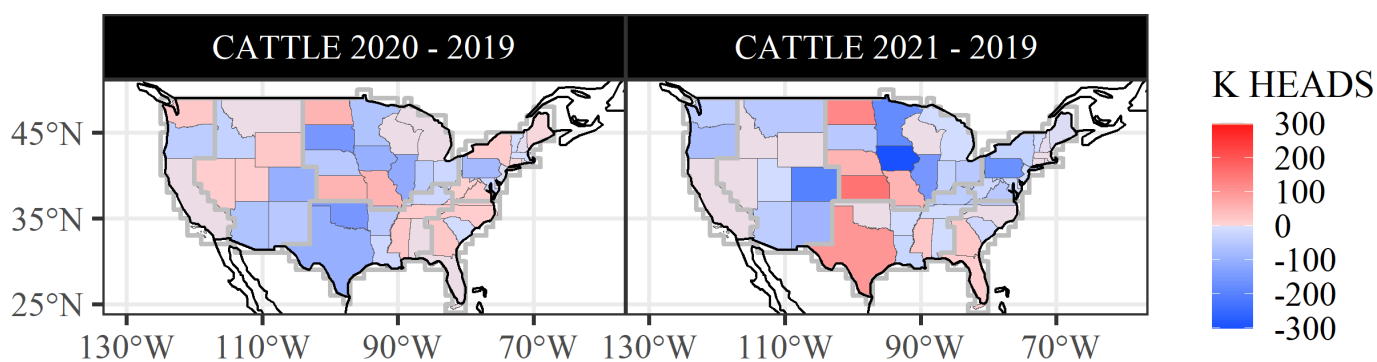

**Figure S9.** Differences in 2021 and 2020 with 2019 cattle head count in the U.S. (USDA, 2023).

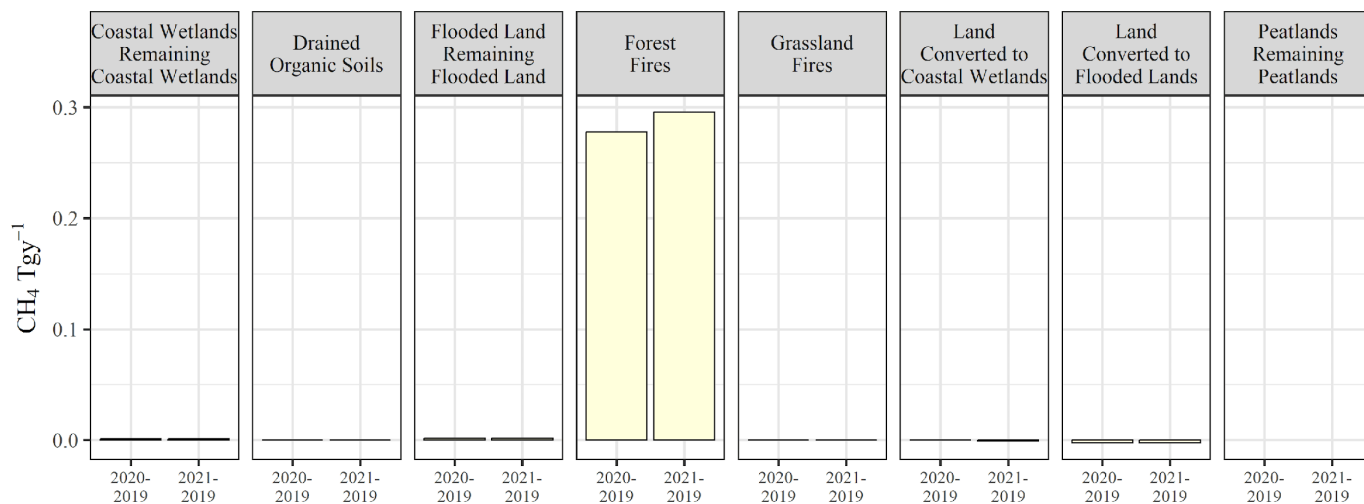

**Figure S10.** 2020-2019 and 2021-2019 CH<sub>4</sub> anomalies (Tgy<sup>-1</sup>) in the land-use and land-use forestry sectors from US EPA (2024).

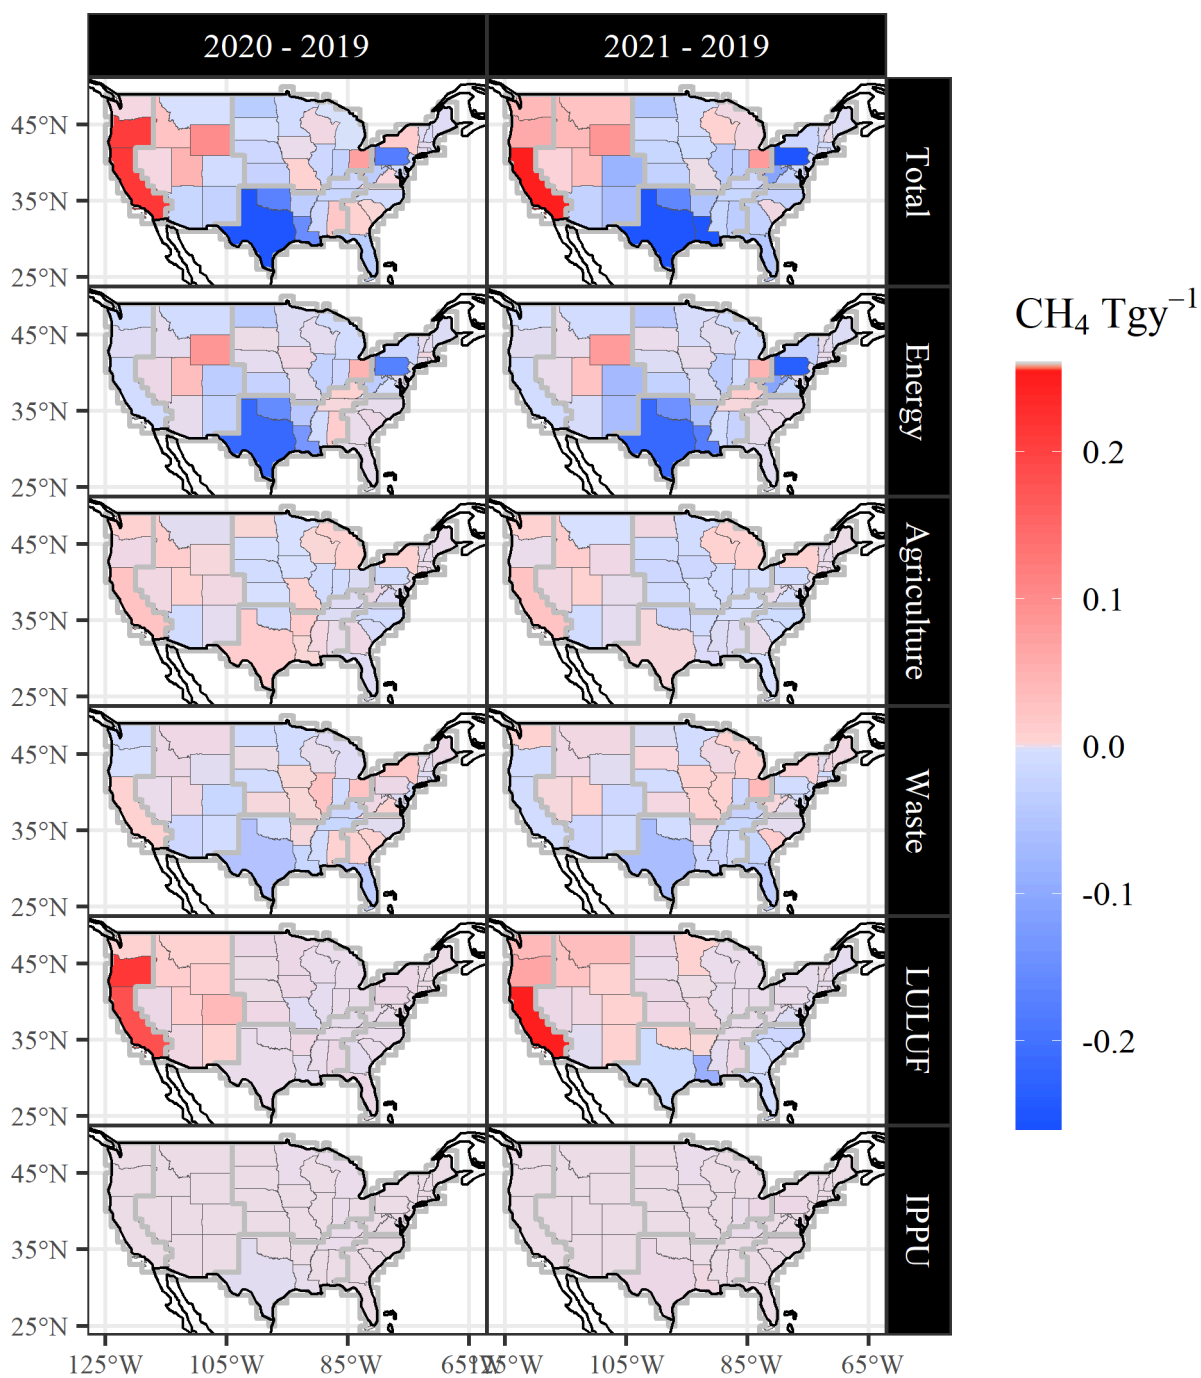

**Figure S11.** Difference of 2020-2019 CH<sub>4</sub> emissions (Tgy<sup>-1</sup>) over the U.S. by state (U.S. EPA, 2023). LULUF refers to land-use, land-use change, and forestry and IPPU refers to industrial processes and product use.

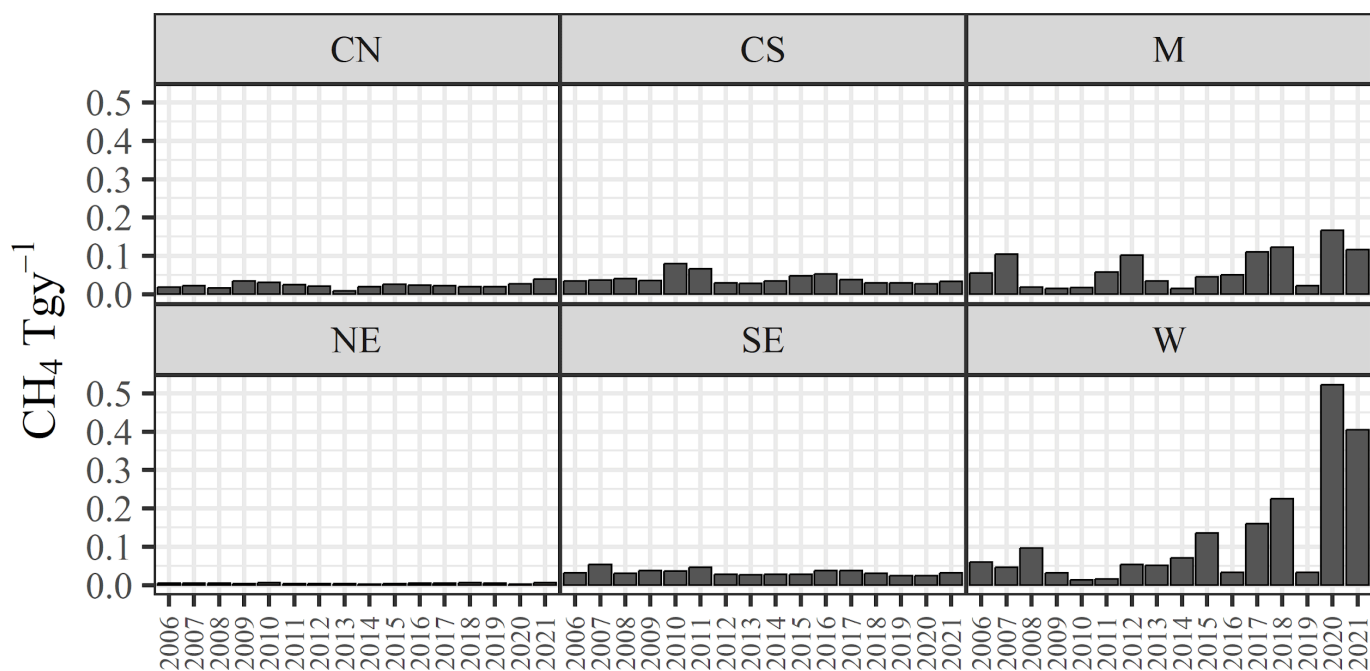

Figure S12. Time series of CH<sub>4</sub> emissions from the Global Fire Emissions Database (van Wess et al., 2022) in Tgy<sup>-1</sup>.

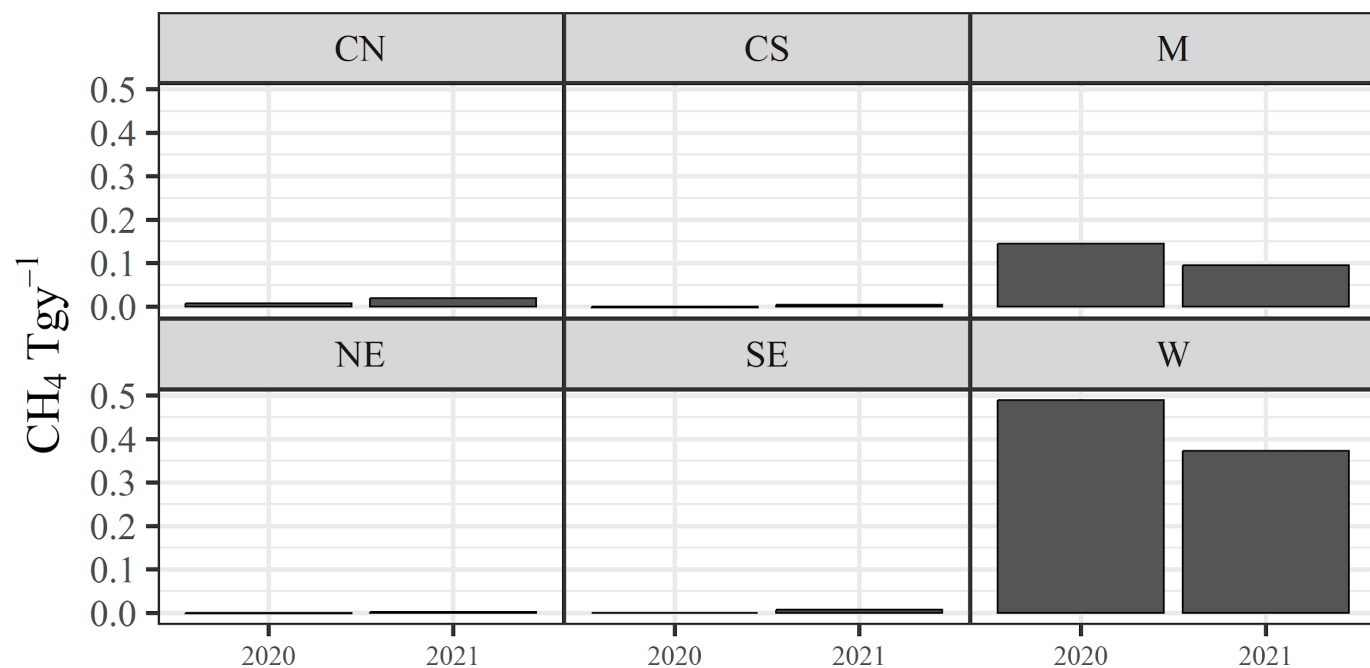

Figure S13. 2020-2019 and 2021-2019 CH<sub>4</sub> anomalies over U.S. regions from the Global Fire Emissions Database (van Wess et al., 2022) in Tgy<sup>-1</sup>.

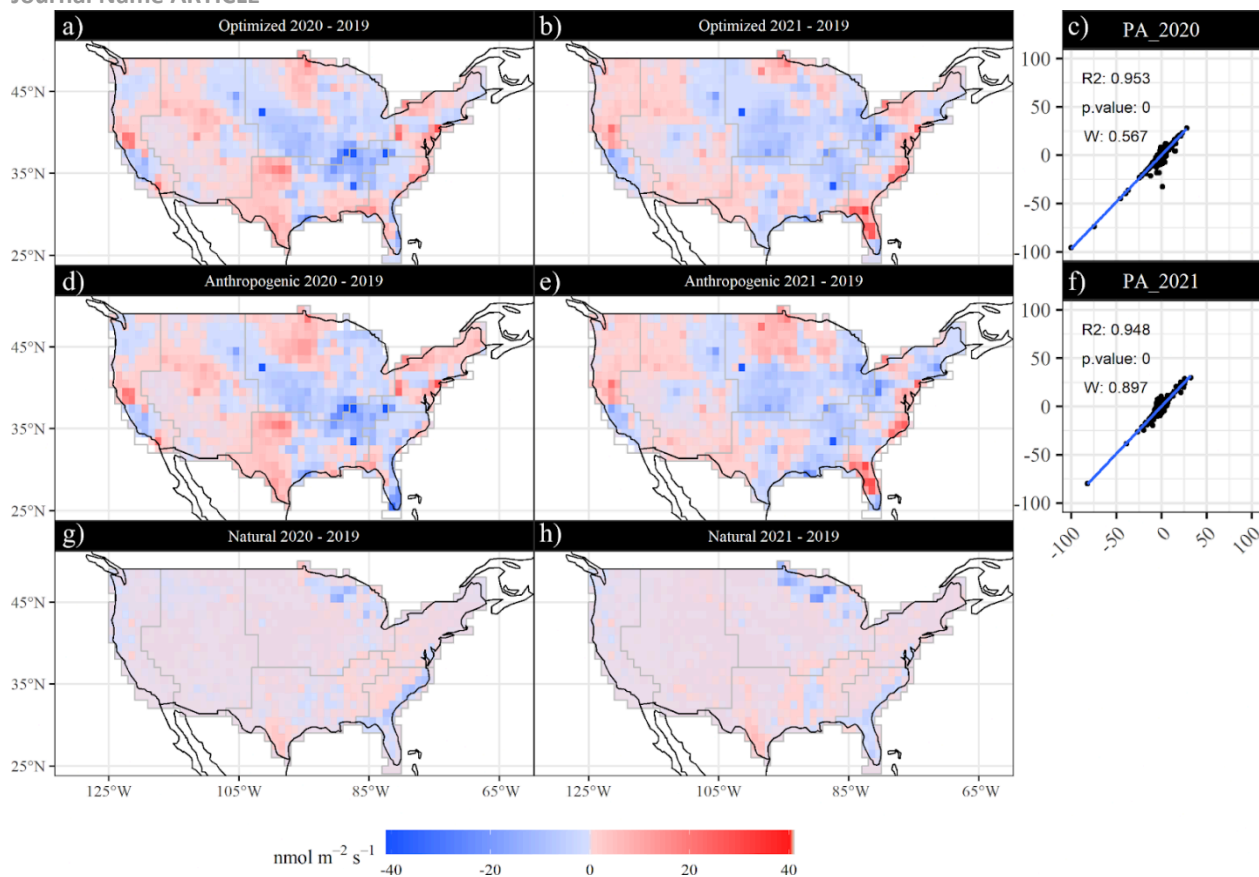

**Figure S14.** Optimized posterior (a and b) and anthropogenic (d and e) CH<sub>4</sub> fluxes as subtractions between mean posterior and natural (g and h) CH<sub>4</sub> fluxes (nmol m<sup>-2</sup> s<sup>-1</sup>). Each panel represents the difference between 2020-2019 and 2021-2020. Panels c and f show correlations between values in panels a and d, and b and c, respectively. The correlation between the posterior and anthropogenic (PA) fluxes was closer to one and significant as the p-values are lower than 0.05. We also tested the difference, finding no significant difference, with every p-value from the Wilcoxon test higher than 0.05 (R Core Team, 2023).

## References

1. Hu, L., Montzka, S. A., Miller, J. B., Andrews, A. E., Lehman, S. J., Miller, B. R., et al. (2015). US emissions of HFC-134a derived for 2008–2012 from an extensive flask-air sampling network. *Journal of Geophysical Research: Atmospheres*, 120(2), 801–825.
2. Youmi Oh, Lori Bruhwiler, Xin Lan, Kenneth Schuldt, Sourish Basu, Kirk Thoning, Sylvia Englund Michel, Reid Clark, John B. Miller, Arlyn Andrews, Tuula Aalto, Marcos Andrade, Shuji Aoki, Francesco Apadula, Jgor Arduini, Sabrina Arnold, Bianca Baier, Lukas

Bäni, Jakob Bartyzel, Gilles Bentz, Tobias Biermann, Sebastien C. Biraud, Pierre-Eric Blanc, Harald Boenisch, Gordon Brailsford, Willi A. Brand, Dominik Brunner, Thao Paul V. Bui, Pim van den Bulk, Benoit Burban, Francescopiero Calzolari, Cecilia S. Chang, Huilin Chen, Lukasz Chmura, Yonghoon Choi, Jason M. St. Clair, Sites Climadat, Julian Della Coletta, Aurelie Colomb, Lino Condori, Franz Conen, Sébastien Conil, Cédric Couret, Monica Crippa, Paolo Cristofanelli, Emilio Cuevas, Roger Curcoll, Bruce Daube, Kenneth J. Davis, Jonathan M. Dean-Day, Marc Delmotte, Ankur Desai, Elizabeth DiGangi, Glenn S. Diskin, Joshua P. DiGangi, Michael Elsasser, Lukas Emmenegger, Gulzhan Esenzhanova, Giuseppe Etiope, Marc L. Fischer, Grant Forster, Arnaud Frumau, Marta Fuente-Lastra, Ryo Fujita, Michal Galkowski, Luciana V. Gatti, Torsten Gehrlein, Christoph Gerbig, Francois Gheusi, Emanuel Gloor, Daisuke Goto, Samuel Hammer, Thomas F. Hanisco, László Haszpra, Juha Hatakka, Martin Heimann, Michal Heliasz, Daniela Heltai, Stephan Henne, Arjan Hensen, Christian Hermans, Ove Hermansen, Antje Hoheisel, Jutta Holst, Tatiana Di Iorio, Laura T. Iraci, Viktor Ivakhov, Daniel A Jaffe, Armin Jordan, Warren Joubert, Hui-Yun Kang, Anna Karion, Victor Kazan, Ralph F. Keeling, Petri Keronen, Bert Kers, Jooil Kim, Jörg Klausen, Tobias Kneuer, Mi-Young Ko, Pasi Kolari, Katerina Kominkova, Eric Kort, Elena Kozlova, Paul B. Krummel, Dagmar Kubistin, Susan S. Kulawik, Nicolas Kumps, Casper Labuschagne, Ray L. Langenfelds, Andrea Lanza, Eric Larmanou, Olivier Laurent, Tuomas Laurila, Thomas Lauvaux, Jost Lavric, Choong-Hoon Lee, Soojeong Lee, Haeyoung Lee, John Lee, Irene Lehner, Kari Lehtinen, Reimo Leppert, Ari Leskinen, Markus Leuenberger, Ingeborg Levin, Janne Levula, Matthias Lindauer, Mikael Ottosson Löfvenius, Zoe M. Loh, Morgan Lopez, David Lowry, Timothy J. Lueker, Chris René Lunder, Toshinobu Machida, Ivan Mammarella, Giovanni Manca, Alistair Manning, Michal V. Marek, Per Marklund, Josette E. Marrero, Melissa Yang Martin, Damien Martin, Giordane A. Martins, Hidekazu Matsueda, Martine De Mazière, Kathryn McKain, Frank Meinhardt, Malika Menoud, Jean-Marc Metzger, N. Mihalopoulos, Natasha L. Miles, Charles E. Miller, Meelis Mölder, Vanessa Monteiro, Stephen Montzka, Fred Moore, Heiko Moossen, Caisa Moreno, Eric Morgan, Josep-Anton Morgui, Shinji Morimoto, Jennifer Müller-Williams, Mathew Mutuku, Cathrine Lund Myhre, Jaroslaw Necki, Sylvia Nichol, Euan Nisbet, Yosuke Niwa, David Murithi Njiru, Steffen Manfred Noe, Florian Obersteiner, Simon O'Doherty, Nina Paramonova, Caroline L. Parworth, Olli Peltola, Carole Philippon, Salvatore Piacentino, Jean Marc Pichon, Penelope Pickers, Joseph Pitt, Jasna Pittman, Christian Plass-Dülmer, Stephen Matthew Platt, Maria Elena Popa, Ben Pouter, Steve Prinzivalli, Michel Ramonet, James Randerson, Scott J. Richardson, Ludwig Ries, Louis-Jeremy Rigouleau, Pedro P. Rivas, Thomas Röckmann, Michael Rothe, Ju-Mee Ryoo, Greg Santoni, Alcide Giorgio di Sarra, Motoki Sasakawa, Bert Scheeren, Martina Schmidt, Tanja Schuck, Marcus Schumacher, Thomas Seifert, Mahesh Kumar Sha, Paul Shepson, Owen Sherwood, Daegeun Shin, Christopher D. Sloop, Dan Smale, Paul D. Smith, Lise Lotte Sørensen, Rodrigo A. F. de Souza, Gerard Spain, Kieran M. Stanley, David Steger, Martin Steinbacher, Britton Stephens, Colm Sweeney, Risto Taipale, Shinya Takatsuki, Kirk Thoning, Helder Timas, Gaston Torres, Pamela Trisolino, Jocelyn Turnbull, Karin Uhse, Taku Umezawa, Carina van der Veen, Alex Vermeulen, Brian Viner, Gabriela Vitkova, Marcel de Vries, Andrew Watson, Ray Weiss, Guido van der Werf, Dietmar Weyrauch, Steven C. Wofsy, Justin Worsley, Doug Worthy, Irène Xueref-Remy, Emma L. Yates, Dickon Young, Camille Yver-Kwok, Sönke Zaehle, Andreas Zahn, Giulia Zazzeri, Christoph Zellweger, Zhen Zhang, Miroslaw Zimnoch. CarbonTracker CH4 2025, 2025. DOI: 10.25925/hxks-v755

- R Core Team. (2024). R: A Language and Environment for Statistical Computing. <https://www.R-project.org/>
- U.S. EPA. (2023). Greenhouse Gas Inventory Data Explorer. In US. EPA. <https://cfpub.epa.gov/ghgdata/inventoryexplorer>
- USDA (2023). National Agricultural Statistics Service (NASS), Agricultural Statistics Board, United States Department of Agriculture (USDA) <https://www.nass.usda.gov/>
- Wickham, H. (2016). ggplot2: Elegant Graphics for Data Analysis. Springer-Verlag New York. <https://ggplot2.tidyverse.org>
- Bruhwyler, L.; Dlugokencky, E.; Masarie, K.; Ishizawa, M.; Andrews, A.; Miller, J.; Mountain, M. 2014. CarbonTracker-CH4: An Assimilation System for Estimating Emissions of Atmospheric Methane. *Atmos. Chem. Phys.* 14 (16), 8269–8293. <https://doi.org/10.5194/acp-14-8269-2014>.
- Hu, L.; Andrews, A. E.; Montzka, S. A.; Miller, S. M.; Bruhwiler, L.; Oh, Y.; Sweeney, C.; Miller, J. B.; McKain, K.; Ibarra Espinosa, S.; Davis, K.; Miles, N.; Mountain, M.; Lan, X.; Crotwell, A.; Madronich, M.; Mefford, T.; Michel, S.; Houwelling, S. 2025. An Unexpected Seasonal Cycle in U.S. Oil and Gas Methane Emissions. *Environ. Sci. Technol.* <https://doi.org/10.1021/acs.est.4c14090>.
- Maasackers, J. D.; McDuffie, E. E.; Sulprizio, M. P.; Chen, C.; Schultz, M.; Brunelle, L.; Thrush, R.; Steller, J.; Sherry, C.; Jacob, D. J.; Jeong, S. 2023. A Gridded Inventory of Annual 2012–2018 US Anthropogenic Methane Emissions. *Environ. Sci. Technol.* 57 (43), 16276–16288. <https://doi.org/10.1021/acs.est.3c03081>.
- U.S. Environmental Protection Agency (U.S. EPA). 2023. Greenhouse Gas Inventory Data Explorer. <https://cfpub.epa.gov/ghgdata/inventoryexplorer/>.
